# Supplementary material
Source: ML conference proceedings conference paper supplement (https://www.ecva.net/papers/eccv_2020/papers_ECCV/html/123490477_ECCV_2020_paper.php)
Supplement: Supplementary file 1 [file 123490477-supp.pdf]

# Supplementary Material for CPGAN: Content-Parsing Generative Adversarial Networks for Text-to-Image Synthesis

Jiadong Liang<sup>1,†</sup>, Wenjie Pei<sup>2,†</sup>, and Feng Lu<sup>1,3,\*</sup>

<sup>1</sup> State Key Lab. of VR Technology and Systems, School of CSE, Beihang University  
<sup>2</sup> Harbin Institute of Technology, Shenzhen <sup>3</sup> Peng Cheng Laboratory, Shenzhen

## 1 Details of Coarse-to-fine Generative Framework

As described in Sec 3.1 in the paper, we adopt three cascaded generators to obtain coarse-to-fine synthesized images. At each stage, the generator  $G_i$  is adopted to generate intermediate feature maps  $\mathbf{C}_i$  which could be directly mapped to generated image by convolutional layers.

As shown in Figure 1 (a), the global embedding for the whole sentence  $\mathbf{s}$  concatenated with Gaussian noise  $\mathbf{z}$  is processed by  $G_0$ , which is composed of a FC layer, a reshape layer and four cascaded upsampling layers. The obtain intermediate feature map  $\mathbf{C}_0$ , together with  $\mathbf{H}_0$ , are then fed into the subsequent generators  $G_1$  and  $G_2$ , which consists of three residual blocks and a upsampling layer. Here  $\mathbf{H}_0$  is the output of the attention model  $F^{att}$  designed to attend to the word embeddings  $\mathbf{W}$  to each pixel of  $\mathbf{C}_0$ . Formally, given the input word embedding  $\mathbf{W} = \{\mathbf{w}_1, \mathbf{w}_2, \dots, \mathbf{w}_T\}$  and the intermediate feature map  $\mathbf{C}_i \in \mathbb{R}^{\hat{d} \times N_i \times N_i}$ , the  $\mathbf{H}_i$  is modeled as:

$$\mathbf{H}_i = F_i^{att}(\mathbf{W}, \mathbf{C}_i), \quad i = 0, 1. \quad (1)$$

Herein  $N_i \times N_i$  is the shape of intermediate feature map at the stage  $i$  and  $\mathbf{w}_t \in \mathbb{R}^d$  denotes the embedding for the  $t$ -th word. The word embeddings are first projected into the common space of the intermediate features by a FC layer, *i.e.*,  $\hat{\mathbf{w}}_t = \mathbf{M}_p \mathbf{w}_t$ , where  $\mathbf{M}_p \in \mathbb{R}^{\hat{d} \times d}$ . Suppose the  $(m, n)$ -th intermediate feature in the feature map is denoted as  $\mathbf{C}_i^{m,n} \in \mathbb{R}^{\hat{d}}$ ,  $m, n \in 1, 2, 3, \dots, N_i$ . We compute the dynamic representation of word embeddings related to the  $(m, n)$ -th intermediate feature by attention mechanism:

$$b_k = \frac{\exp((\mathbf{C}_i^{m,n})^T \hat{\mathbf{w}}_k)}{\sum_{p=1}^T \exp((\mathbf{C}_i^{m,n})^T \hat{\mathbf{w}}_p)}, \quad n = 1, 2, \dots, T, \quad (2)$$
$$\mathbf{H}_i^{m,n} = \sum_{k=1}^T b_k \hat{\mathbf{w}}_k,$$

<sup>†</sup> Both authors contributed equally.

<sup>\*</sup> Corresponding Author: Feng Lu (lufeng@buaa.edu.cn)

This work was supported by National Natural Science Foundation of China (NSFC) under Grant 61972012 and 61732016.

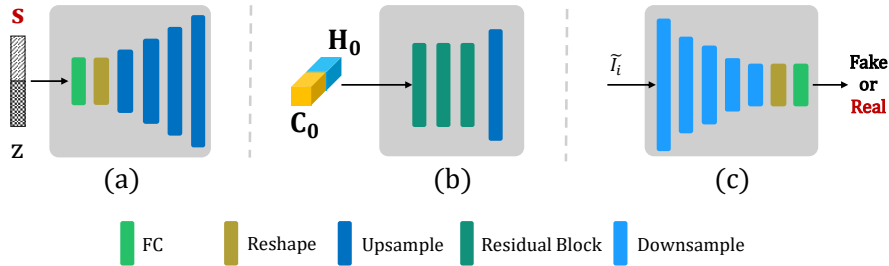

Fig. 1: Illustration of the coarse-to-fine framework of our CPGAN: (a) the structure of the initial generator  $G_0$ ; (b) the structure of generators  $G_1, G_2$ ; (c) the structure of unconditional discriminator.

where  $\mathbf{H}_i \in \mathbb{R}^{\hat{d} \times N_i \times N_i}$  is the dynamic representation of word embeddings related to the intermediate feature maps  $\mathbf{C}_i$ .

## 2 The Structure of Unconditional Discriminators

The unconditional discriminator  $D_i^{uc}$  in Sec 3.1 in the paper consists of five cascaded downsampling layers, a Reshape layer and a FC layer, as illustrated in Figure 1 (c).

## 3 DAMSM Loss

We employ DAMSM [1] to construct our TISCL loss function for modeling the non-matching loss between a textual description  $X$  and the corresponding synthesized image  $\tilde{I}$ . Formally, given the final word embeddings  $\mathbf{W} = \{\mathbf{w}_1, \mathbf{w}_2, \dots, \mathbf{w}_T\}$  and sentence embedding  $\mathbf{s}$  obtained by our text encoder in Equation 8 in the paper and the image embedding  $\mathbf{V} \in \mathbb{R}^{256 \times 100}$  by our image encoder shown in Equation 9 in the paper, the TISCL is modeled as:

$$\mathcal{L}_{\text{TISCL}} = \mathcal{L}_{\text{DAMSM}}(\mathbf{W}, \mathbf{s}, \mathbf{V}, \mathbf{f}). \quad (3)$$

Here  $\mathbf{f} \in \mathbb{R}^d$  is the image global feature extracted from the last average pooling layer of Inception-V3. We use  $\mathbf{w}_T$  as the sentence embedding  $\mathbf{s} \in \mathbb{R}^d$ .

We first reshape  $\mathbf{W}$  into matrix  $\bar{\mathbf{W}} \in \mathbb{R}^{d \times T}$ . The similarity matrix for pairs of words and sub-regions is computed by:

$$\mathbf{Sim} = (\bar{\mathbf{W}})^T \mathbf{V}, \quad (4)$$

where  $\mathbf{Sim}_{i,j}$  is the dot-product similarity between the  $i$ -th word of the sentence and the  $j$ -th sub-region of the image. We calculate the dynamic representation  $\mathbf{c}_i$  for the word embedding  $\mathbf{w}_i$  attending to the sub-regions of the image features by:

$$\bar{\mathbf{Sim}}_{i,j} = \frac{\exp(\mathbf{Sim}_{i,j})}{\sum_{k=1}^T \exp(\mathbf{Sim}_{k,j})}, \quad (5)$$

$$\alpha_j = \frac{\exp(\gamma_1 \bar{\mathbf{Sim}}_{i,j})}{\sum_{k=1}^{100} \exp(\gamma_1 \bar{\mathbf{Sim}}_{i,k})}, \quad (6)$$

$$\mathbf{c}_i = \sum_{j=1}^{100} \alpha_j \mathbf{V}[:, j], \quad (7)$$

where  $\gamma_1$  is a factor that determines how much attention is paid to features of its relevant sub-regions when computing the region-context vector for a word. Finally, we define the semantic consistency between each word of input text and different sub-region of the image using the cosine similarity, *i.e.*,  $R(\mathbf{c}_i, \mathbf{w}_i) = (\mathbf{c}_i^T \mathbf{w}_i) / (\|\mathbf{c}_i\| \|\mathbf{w}_i\|)$ . The image-text matching score between the entire image  $\mathbf{I}$  and the whole sentence description  $\mathbf{D}$  is define as:

$$R(\mathbf{I}, \mathbf{D}) = \log\left(\sum_{i=1}^T \exp(\gamma_2 R(\mathbf{c}_i, \mathbf{w}_i))\right)^{1/\gamma_2}, \quad (8)$$

where  $\gamma_2$  is a factor that determines how much to magnify the importance of the most relevant word-to-region-context pair.

In a mini-batch of iteration, the posterior probability of sentence  $\mathbf{D}_i$  matching with the corresponding image  $\mathbf{I}_i$  is obtained by:

$$P(\mathbf{D}_i|\mathbf{I}_i) = \frac{\exp(R(\gamma_3 \mathbf{I}_i, \mathbf{D}_i))}{\sum_{j=1}^M \exp(R(\gamma_3 \mathbf{I}_i, \mathbf{D}_j))}, \quad (9)$$

where  $\gamma_3$  is a smoothing factor determined by experiments.  $M$  is batch size. Then the word-level loss function of the positive image-sentence pair in a mini-batch is define as:

$$\mathcal{L}^w = - \sum_{i=1}^M \log P(\mathbf{D}_i|\mathbf{I}_i) + \log P(\mathbf{I}_i|\mathbf{D}_i) \quad (10)$$

For the sentence embedding  $\mathbf{s}$  and the image global feature  $\mathbf{f}$ , we define the image-text matching score by:

$$\hat{R}(\mathbf{I}, \mathbf{D}) = (\mathbf{f}^T \mathbf{s}) / (\|\mathbf{f}^T\| \|\mathbf{s}\|). \quad (11)$$

The sentence-level loss  $\mathcal{L}^s$  is modeled as:

$$\hat{P}(\mathbf{D}_i|\mathbf{I}_i) = \frac{\exp(\hat{R}(\gamma_3 \mathbf{I}_i, \mathbf{D}_i))}{\sum_{j=1}^M \exp(\hat{R}(\gamma_3 \mathbf{I}_i, \mathbf{D}_j))} \quad (12)$$

$$\mathcal{L}^s = - \sum_{i=1}^M \log \hat{P}(\mathbf{D}_i | \mathbf{I}_i) + \log \hat{P}(\mathbf{I}_i | \mathbf{D}_i) \quad (13)$$

Finally, the DAMSM loss is define as:

$$\mathcal{L}_{DAMSM} = \mathcal{L}^w + \mathcal{L}^s \quad (14)$$

## References

1. Xu, T., Zhang, P., Huang, Q., Zhang, H., Gan, Z., Huang, X., He, X.: AttnGAN: Fine-grained text to image generation with attentional generative adversarial networks. In: Proceedings of the IEEE Conference on Computer Vision and Pattern Recognition(CVPR). pp. 1316–1324 (2018)
